# Supplementary material
Source: publisher figshare collection journal article supplement (https://acs.figshare.com/ndownloader/files/3963535)
Supplement: Supplementary file 1 [file 3963535]

**Supplementary Table S1** Comparison between PTS and filter-aided sample preparation (FASP) methods. Forty micrograms of Eph4 cell proteins were reduced, alkylated, and digested using the two methods. The number of identified peptides are shown.

| Protein extraction method | No. of identified peptides |
|---------------------------|----------------------------|
| PTS                       | 3006                       |
| FASP                      | 824                        |
